# Supplementary material for: N-Rich hetero-porous defective carbon induced by trace B-doping enables efficient oxygen reduction
Source: Royal Society of Chemistry journal article supplement (doi:10.1039/d0cc04407e), 2020-01-01
Supplement: d0cc04407e1.pdf [file d0cc04407e1.pdf]

## Supporting Information

### Experimental

**Synthesis of B-NC-x catalysts.** 1.1g glucose, 1.1g basic zinc carbonate, 0.6g urea and certain amount of boric acid were mixed in a mortar. The mixture was then calcinated at 900 °C (3 °C/min) for 2 h. After cooling to the room temperature, the pyrolysis product was treated in a 1 M H<sub>2</sub>SO<sub>4</sub> solution at 80 °C for 4 h. The final products were obtained after repeatedly washing by deionized water and ethanol.

**Characterizations.** The crystal phase of both freshly synthesized powders were detected by X-ray diffraction (XRD, Bruker AXS D8-Focus, Germany) with Cu K $\alpha$  radiation in the range of 2 $\theta$  from 10° to 80°. The micromorphology of B-NC-x and NC powders were observed by means of a field emission scanning electron microscopy (FESEM, Hitachi SU8010, Japan). The X-ray photoelectron spectroscopy (XPS, Escalab 250XI, ThermoFisher, USA) was employed to further explore the composition, chemical environment and surface electronic state of the samples. All XPS profiles are aligned by C 1s (284.60 eV). The specific surface area was determined by the Brunauer-Emmett-Teller (BET) method on the basis of the N<sub>2</sub> adsorption isotherm, and the mesopore distribution was analyzed by Barrett-Joyner-Halenda (BJH) method based on the data of the desorption branch using a TriStar II 3020 (Micromeritics Instrument Corporation, USA). The Raman spectra of as-obtained B-NC-x and NC catalysts were acquired using a Renishaw System RM-1000 spectrometer. The B content of all samples were measured by Inductively coupled

plasma mass spectrometry (ICP-MS), the C and N content of all samples were provided by Elemental analysis.

**Electrochemical measurements.** All the electrochemical measurements were performed on a CHI 760E electrochemical workstation with a typical three-electrode system configuration in 1 M KOH electrolyte saturated with N<sub>2</sub> or O<sub>2</sub>. Typically, 2 mg Vulcan XC-72R carbon black and 2 mg respectively of commercial 20 wt% Pt/C (Johnson Matthey HiSPEC 3000 purchased at Alfa Aesar) powder or as-prepared B-NC-x catalyst were dispersed in 650  $\mu$ L deionized water, 300  $\mu$ L ethanol and 50  $\mu$ L Nafion solution via ultrasonic treatment for 1h to obtain a homogeneous dispersion. Subsequently, 144  $\mu$ L of the resulting ink (containing 288  $\mu$ g of catalyst) was pipetted on the surface of rotating disc electrode (RDE) in a diameter of 4 mm and then air-dried, i.e. catalyst mass loading was 2.29 mg cm<sup>-2</sup>. LSV at a scan rate of 5 mV s<sup>-1</sup> was performed under O<sub>2</sub>-saturated 1 M KOH electrolyte using RDE coated with various catalysts as the working electrode at a rotating speed of 1600 rpm, graphite rod as the counter electrode and Hg/HgO electrode as the reference electrode. Cyclic Voltammetry (CV) was conducted at a scan rate of 50 mV s<sup>-1</sup> ranging from 0.2 to 1.1 V. vs. RHE. The reference electrode, Hg/HgO, was calibrated with respect to the reversible hydrogen electrode (RHE),  $ERHE = EHg/HgO + 0.059 \times pH + 0.099$ . For the chronoamperometric (I-t) response investigation, the working electrode was biased at ERHE=0.6V in alkaline media for 35000s. The ORR stability was also evaluated by comparing the LSV curves before and after 10000 CV cycles (across the potential window of 0.1–0.4 V vs. RHE) at a

sweep rate of 50 mV s<sup>-1</sup>. The peroxide yields (HO<sub>2</sub><sup>-</sup>%) and the electron transfer number (n) are calculated with the following equation.

$$HO_2^- \% = \frac{200i_r}{N(i_d + \frac{i_r}{N})} \quad n = \frac{4i_d}{i_d + \frac{i_r}{N}}$$

Where  $i_d$  is the disk current,  $i_r$  is the ring current, and  $N$  is the current collection efficiency of the Pt ring. (Measured value  $N=0.26$ )

The RDE tests were measured at various rotating speeds ranging from 400 to 2025 rpm with a sweep rate of 5 mV s<sup>-1</sup>. The electron transfer number (n) can be calculated using Koutecky-Levich equation:

$$\frac{1}{J} = \frac{1}{J_L} + \frac{1}{J_K} = \frac{1}{B\omega^{\frac{1}{2}}} + \frac{1}{J_K} \quad B = 0.62nFC_0D_0^{\frac{2}{3}}V^{-\frac{1}{6}}$$

where  $J$  is the measured current density,  $J_K$  and  $J_L$  are the kinetic and limiting current densities,  $\omega$  is the angular velocity of the disk,  $n$  is the electron transfer number,  $F$  is the Faraday constant (96485 C mol<sup>-1</sup>),  $C_0$  is the bulk concentration of O<sub>2</sub> (1.2 × 10<sup>-6</sup> mol cm<sup>-3</sup>),  $D_0$  is the diffusion coefficient of O<sub>2</sub> in 1 M KOH (1.93 × 10<sup>-5</sup> cm<sup>2</sup> s<sup>-1</sup>), and  $V$  is the kinematic viscosity of the electrolyte (0.01 cm<sup>2</sup> s<sup>-1</sup>).

All of the potentials reported in this study were referenced to a reversible hydrogen electrode (RHE) and all of the current densities reported in in this study were normalized by geometric area of electrode.

## Supplementary Results

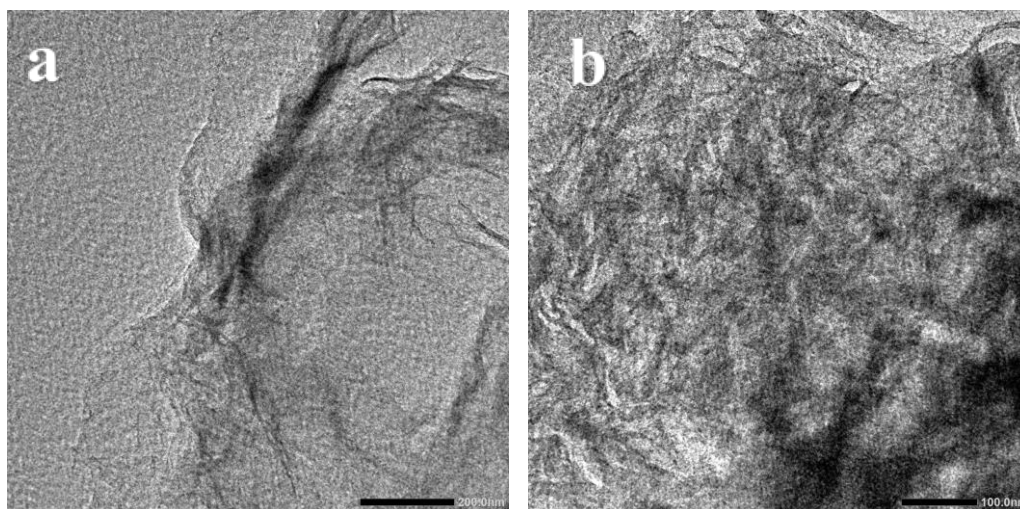

**Figure S1.** TEM images of B-NC-2.

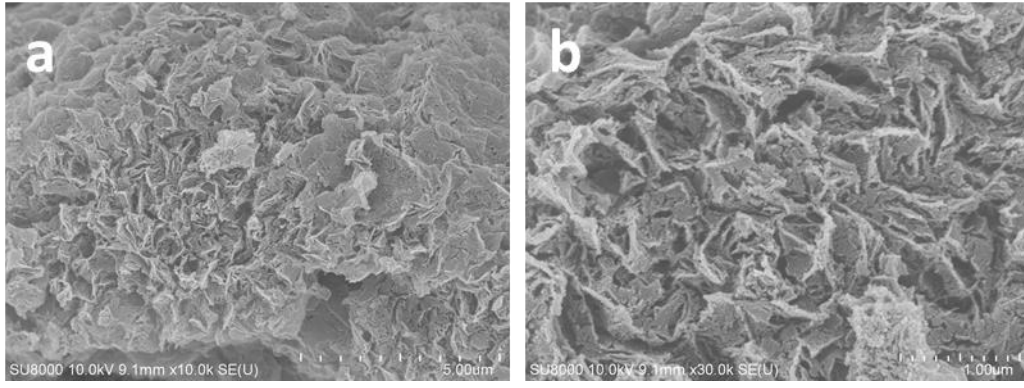

**Figure S2.** SEM images of the B-NC-0 catalyst.

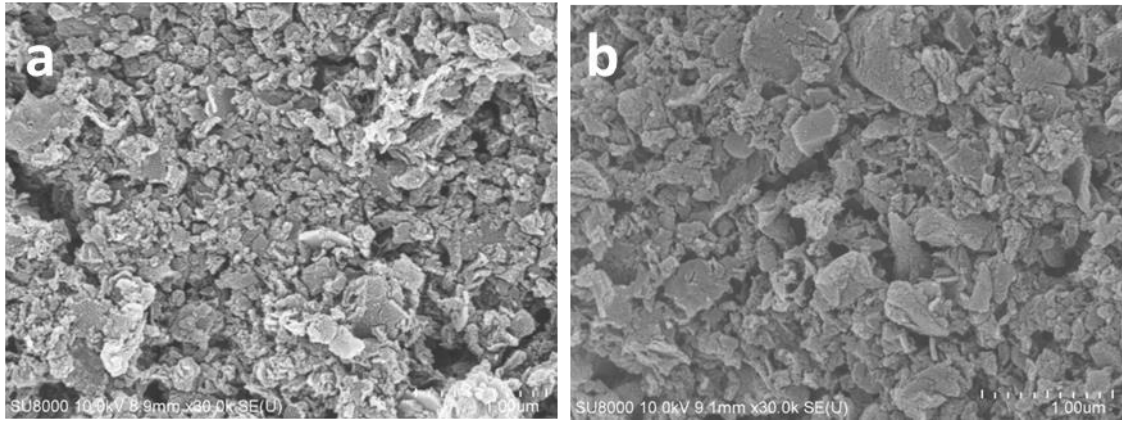

**Figure S3.** SEM images of (a) B-NC-1 and (b) B-NC-3.

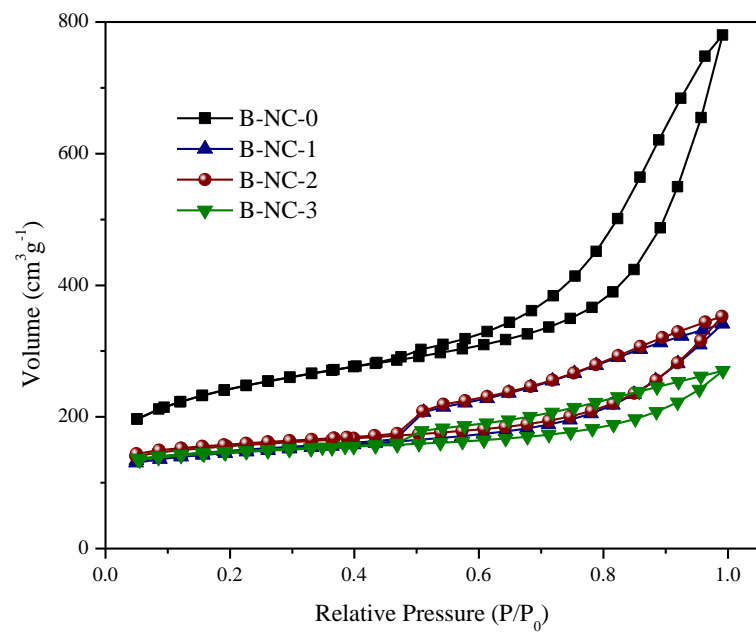

**Figure S4.** Nitrogen sorption isotherms of the B-NC-x catalysts.

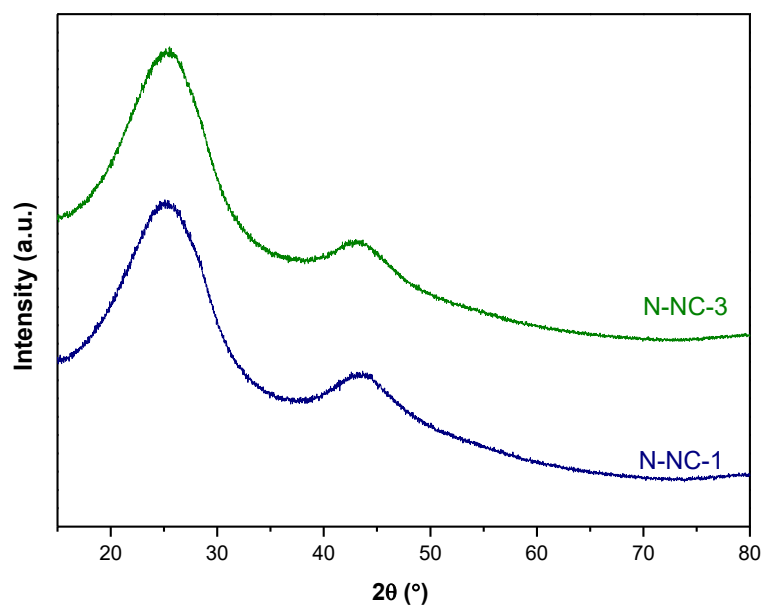

**Figure S5.** XRD patterns of the B-NC-1 and B-NC-3 catalysts.



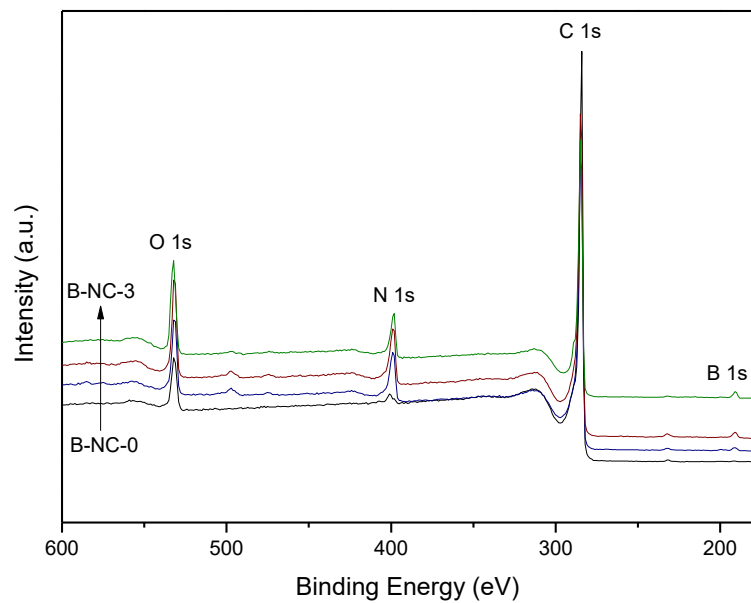

**Figure S6.** XPS survey spectra of the B-NC-x catalysts.

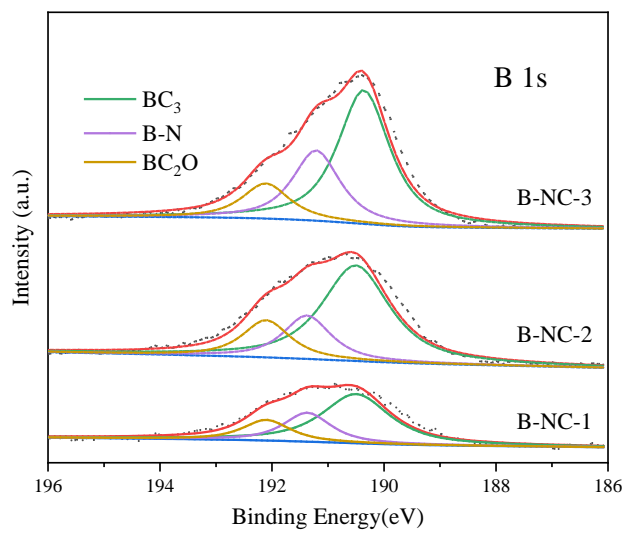

**Figure S7.** Deconvoluted B 1s XPS spectra of the B-NC-1, B-NC-2 and B-NC-3 catalysts.

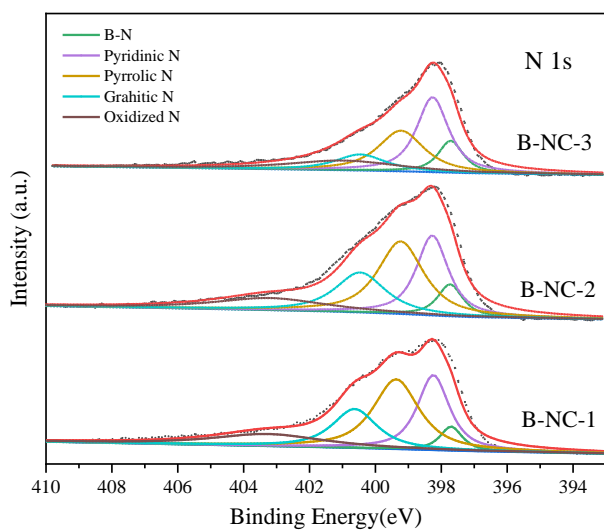

**Figure S8.** Deconvoluted N 1s XPS spectra of the B-NC-1, B-NC-2 and B-NC-3 catalysts.

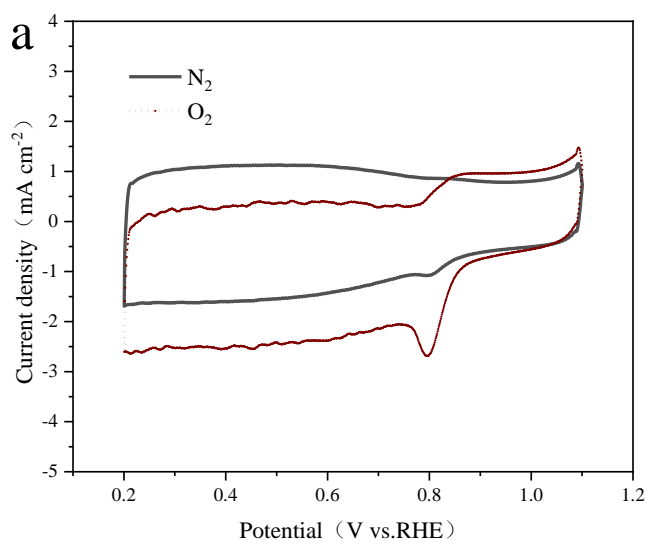

**Figure S9.** CVs of B-NC-2 in  $\text{N}_2/\text{O}_2$ -saturated 1 M KOH at a scan rate of  $50 \text{ mV s}^{-1}$ .

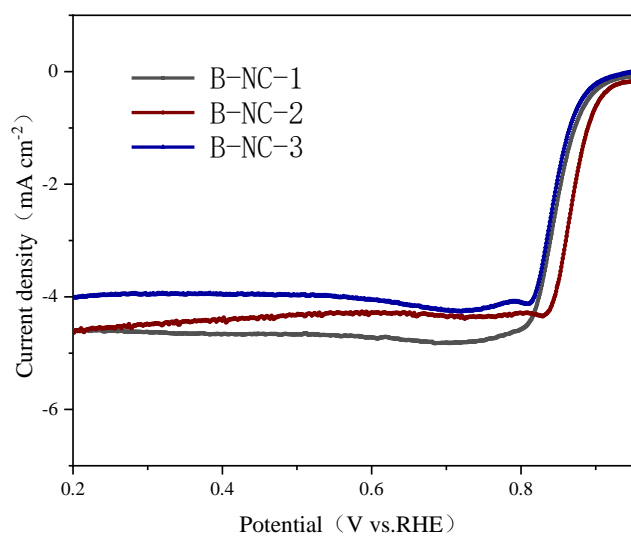

**Figure S10.** LSV curves of B-NC-1, B-NC-2 and B-NC-3 at a scan rate of  $5 \text{ mV s}^{-1}$ .

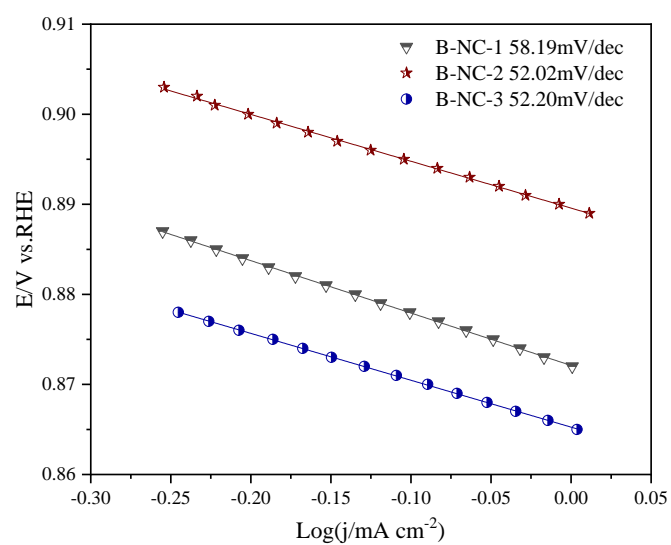

**Figure S11.** Tafel plots of B-NC-1, B-NC-2 and B-NC-3.

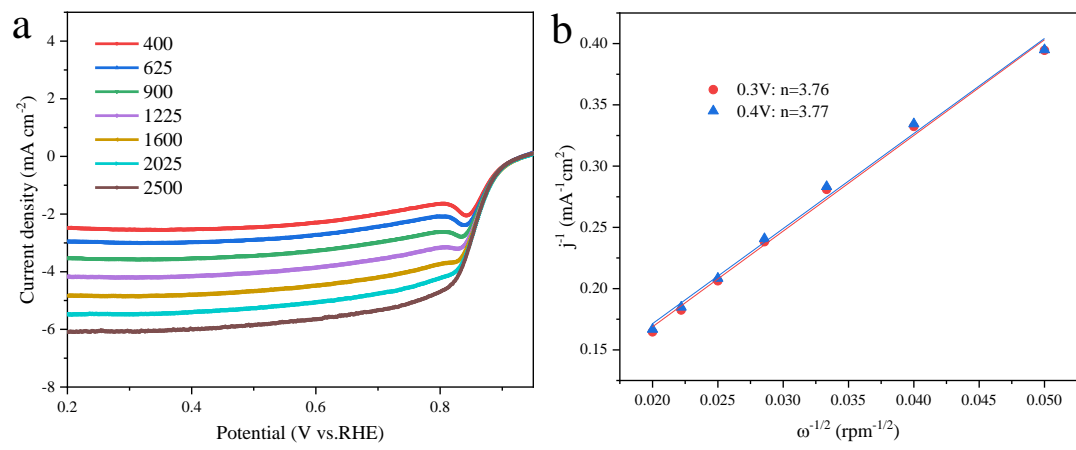

**Figure S12.** LSV curves of B-NC-2 at different rotating speeds and (b) electron transfer number of B-NC-2.

**Table S1.** Bulk elemental composition of the B-NC-x catalysts provided by Elemental analysis (N and C) and inductively coupled plasma – mass spectrometry analysis (B).

|        | B (wt.%) | N (wt.%) | C (wt.%) |
|--------|----------|----------|----------|
| B-NC-0 | 0        | 1.04     | 78.39    |
| B-NC-1 | 0.95     | 9.73     | 62.67    |
| B-NC-2 | 1.83     | 10.13    | 59.91    |
| B-NC-3 | 1.97     | 10.96    | 58.95    |



**Table S2.** The content of pyrrolic N and pyridinic N in the catalysts.

|        | pyridinic N (Atomic %) | pyrrolic N (Atomic %) |
|--------|------------------------|-----------------------|
| B-NC-0 | 0.33                   | 0.14                  |
| B-NC-1 | 2.89                   | 3.85                  |
| B-NC-2 | 2.96                   | 3.83                  |
| B-NC-3 | 2.94                   | 3.67                  |
